# Supplementary material for: Opinion Polls and Antibody Response Dynamics of Vaccination with COVID-19 Booster Vaccines
Source: MDPI journal article supplement (doi:10.3390/vaccines10050647), 2022-04-20
Supplement: s1 [file s1]

# Supplementary File

**Yufei Wu<sup>1,2,3</sup>, Huanjie Li<sup>1,2,\*</sup>, Yangyang Wang<sup>1,2</sup>, Ping Huang<sup>2</sup>, Yihui Xu<sup>2</sup>, Mingjie Xu<sup>2</sup>,  
Qianqian Zhao<sup>2</sup>, Yunying Zhou<sup>2</sup>, Jun Wang<sup>2</sup>, Mingyu Ji<sup>1,2,3</sup>, and Yunshan Wang<sup>1,2,\*</sup>**

**Table S1.** Linear regression model of respondent preferences with vaccination (n = 366; reference = 92.66%)

| Attribute                                   | P-value | 95% CI          |
|---------------------------------------------|---------|-----------------|
| Age                                         | 0.691   | -0.041 ~ 0.027  |
| Education                                   | 0.984   | -0.029 ~ 0.030  |
| Occupation                                  | 0.687   | -0.006 ~ 0.004  |
| Health                                      | 0.559   | -0.051 ~ 0.095  |
| Basic illness                               | 0.812   | -0.018 ~ 0.014  |
| Vaccine related side-effects                | 0.013*  | -0.110 ~ -0.013 |
| Knowledge of precautions for vaccines       | 0.000** | 0.114 ~ 0.304   |
| Understanding the vaccine pathway           | 0.597   | -0.005 ~ 0.008  |
| Knowledge of COVID-19                       | 0.022*  | 0.007 ~ 0.086   |
| Frequency of concern about COVID-19 vaccine | 0.007** | 0.014 ~ 0.084   |

\* p<0.05, This factor has a significant correlation with the willingness to get the third dose of COVID-19 vaccine;

\*\* p<0.01, This factor has a very significant correlation with the willingness to vaccinate; n = 366, 366 people who were willing to be vaccinated; reference = 92.66%, The people who are willing to be vaccinated account for 92.66% of the total number of participants.

**Table S2.** Symptoms by participant after the third dose of COVID-19 vaccine (n=138)

| Individual symptoms                    | n   | %      |
|----------------------------------------|-----|--------|
| No adverse effect                      | 78  | 56.52% |
| Dizziness and nausea                   | 7   | 5.07%  |
| Fever                                  | 7   | 5.07%  |
| Muscle ache                            | 44  | 31.88% |
| Cough                                  | 1   | 0.72%  |
| Diarrhea                               | 1   | 0.72%  |
| got the third dose of COVID-19 vaccine | 138 |        |

n = 138, 138 people who have the third dose of COVID-19 vaccine; %, the percentage of this item to the total number of 138.

**Table S3.** Analysis of respondents' awareness of the necessity of the third shot (booster shots)

| Attitude              | Necessity of Getting booster shots of COVID-19 Vaccine(n=395) |      |             |      |        |       |          |       |                    |       |
|-----------------------|---------------------------------------------------------------|------|-------------|------|--------|-------|----------|-------|--------------------|-------|
|                       | Extremely disapproval                                         |      | Disapproval |      | Unsure |       | approval |       | Extremely approval |       |
|                       | n                                                             | %    | n           | %    | n      | %     | n        | %     | n                  | %     |
| Significance          | 11                                                            | 2.78 | 7           | 1.77 | 44     | 11.14 | 58       | 14.68 | 275                | 69.62 |
| Preventability        | 13                                                            | 3.29 | 9           | 2.28 | 43     | 10.89 | 55       | 13.92 | 275                | 69.2  |
| Protective Capability | 14                                                            | 3.54 | 7           | 1.77 | 43     | 10.89 | 54       | 13.67 | 277                | 70.13 |
| Necessity             | 13                                                            | 3.29 | 10          | 2.53 | 38     | 9.62  | 44       | 11.14 | 290                | 73.42 |

n. The total number of people who participated in the survey; %, the percentage of this item to the total number of participants.

**Table S4.** SARS-CoV-2 S-specific binding antibody spearman correlation (detail)

|                                                                           |                | SARS-CoV-2 S-specific binding<br>Antibody 7 days<br>after<br>vaccination | SARS-CoV-2 S-specific binding<br>Antibody 14<br>days after<br>vaccination | SARS-CoV-2 S-specific binding<br>Antibody 21<br>days after<br>vaccination | SARS-CoV-2 S-specific binding<br>Antibody 28<br>days after<br>vaccination | SARS-CoV-2 S-specific binding<br>Antibody 56<br>days after<br>vaccination |
|---------------------------------------------------------------------------|----------------|--------------------------------------------------------------------------|---------------------------------------------------------------------------|---------------------------------------------------------------------------|---------------------------------------------------------------------------|---------------------------------------------------------------------------|
| SARS-CoV-2 S-specific binding<br>Antibody 7 days<br>before<br>vaccination | Coefficient    | 0.4                                                                      | 0.8**                                                                     | 0.7**                                                                     | 0.7**                                                                     | 0.5*                                                                      |
|                                                                           | <i>p</i> value | 0.2                                                                      | 0.0                                                                       | 0.0                                                                       | 0.0                                                                       | 0.0                                                                       |
| Time interval<br>between last<br>needle and<br>strengthening<br>needle    | Coefficient    | 0.1                                                                      | -0.3                                                                      | -0.3                                                                      | -0.2                                                                      | -0.3                                                                      |
|                                                                           | <i>p</i> value | 0.7                                                                      | 0.2                                                                       | 0.2                                                                       | 0.4                                                                       | 0.2                                                                       |

\*  $p < 0.05$  \*\*  $p < 0.01$

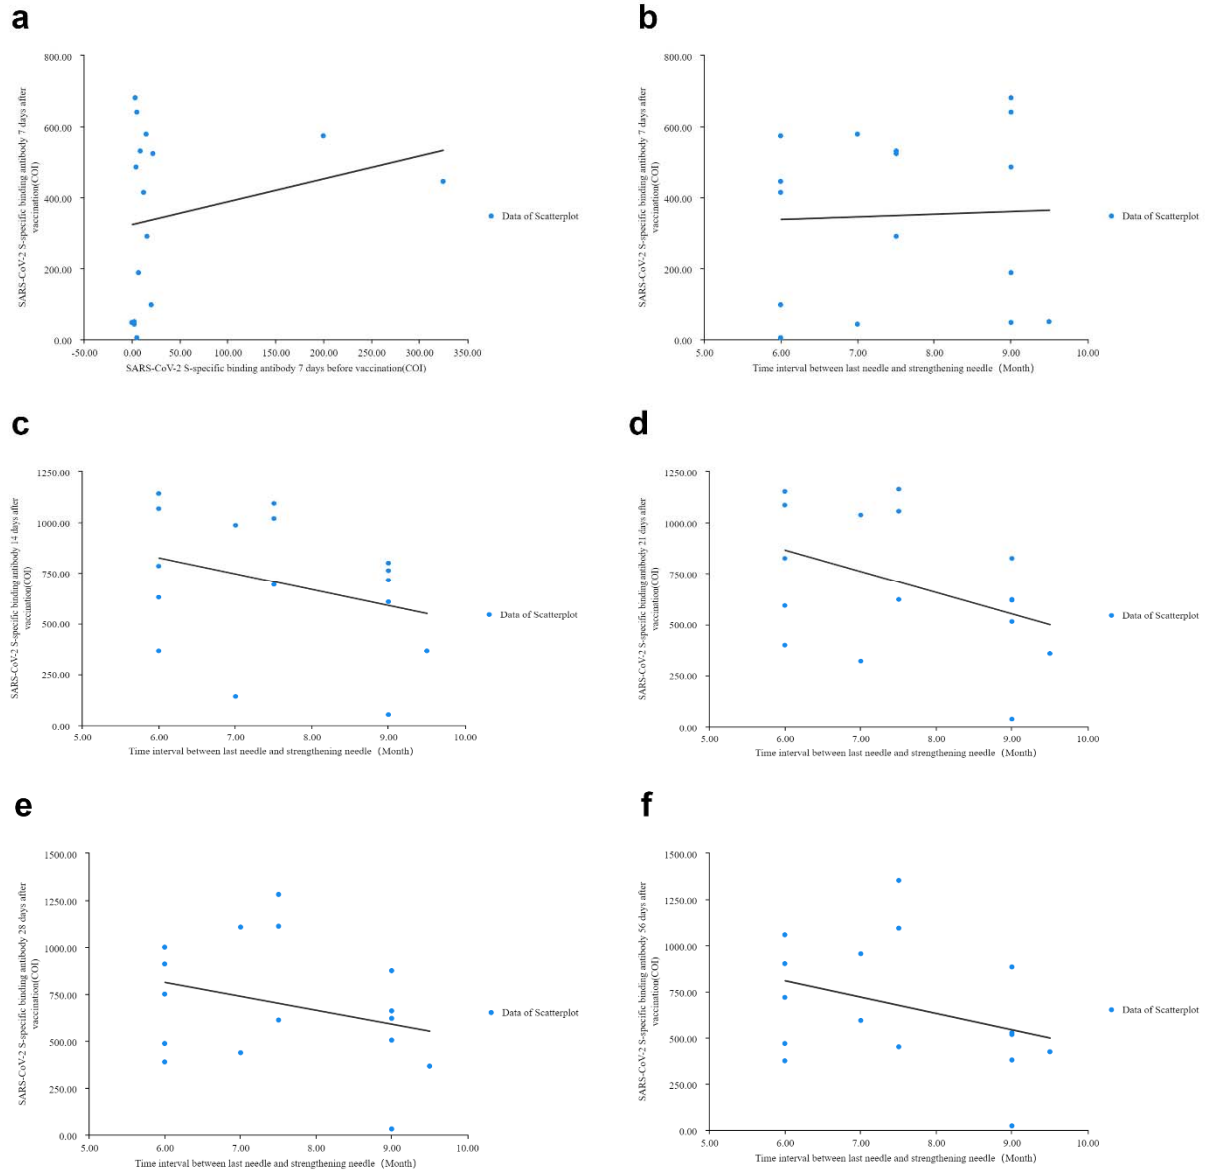

**Figure. S1.** The correlation analysis initial antibody concentration or booster vaccination interval and antibody concentration.

a. The correlation between initial antibody concentration and antibody concentration at seven days after vaccination.

b-f. The correlation between booster vaccination interval and antibody concentration at seven days after vaccination.

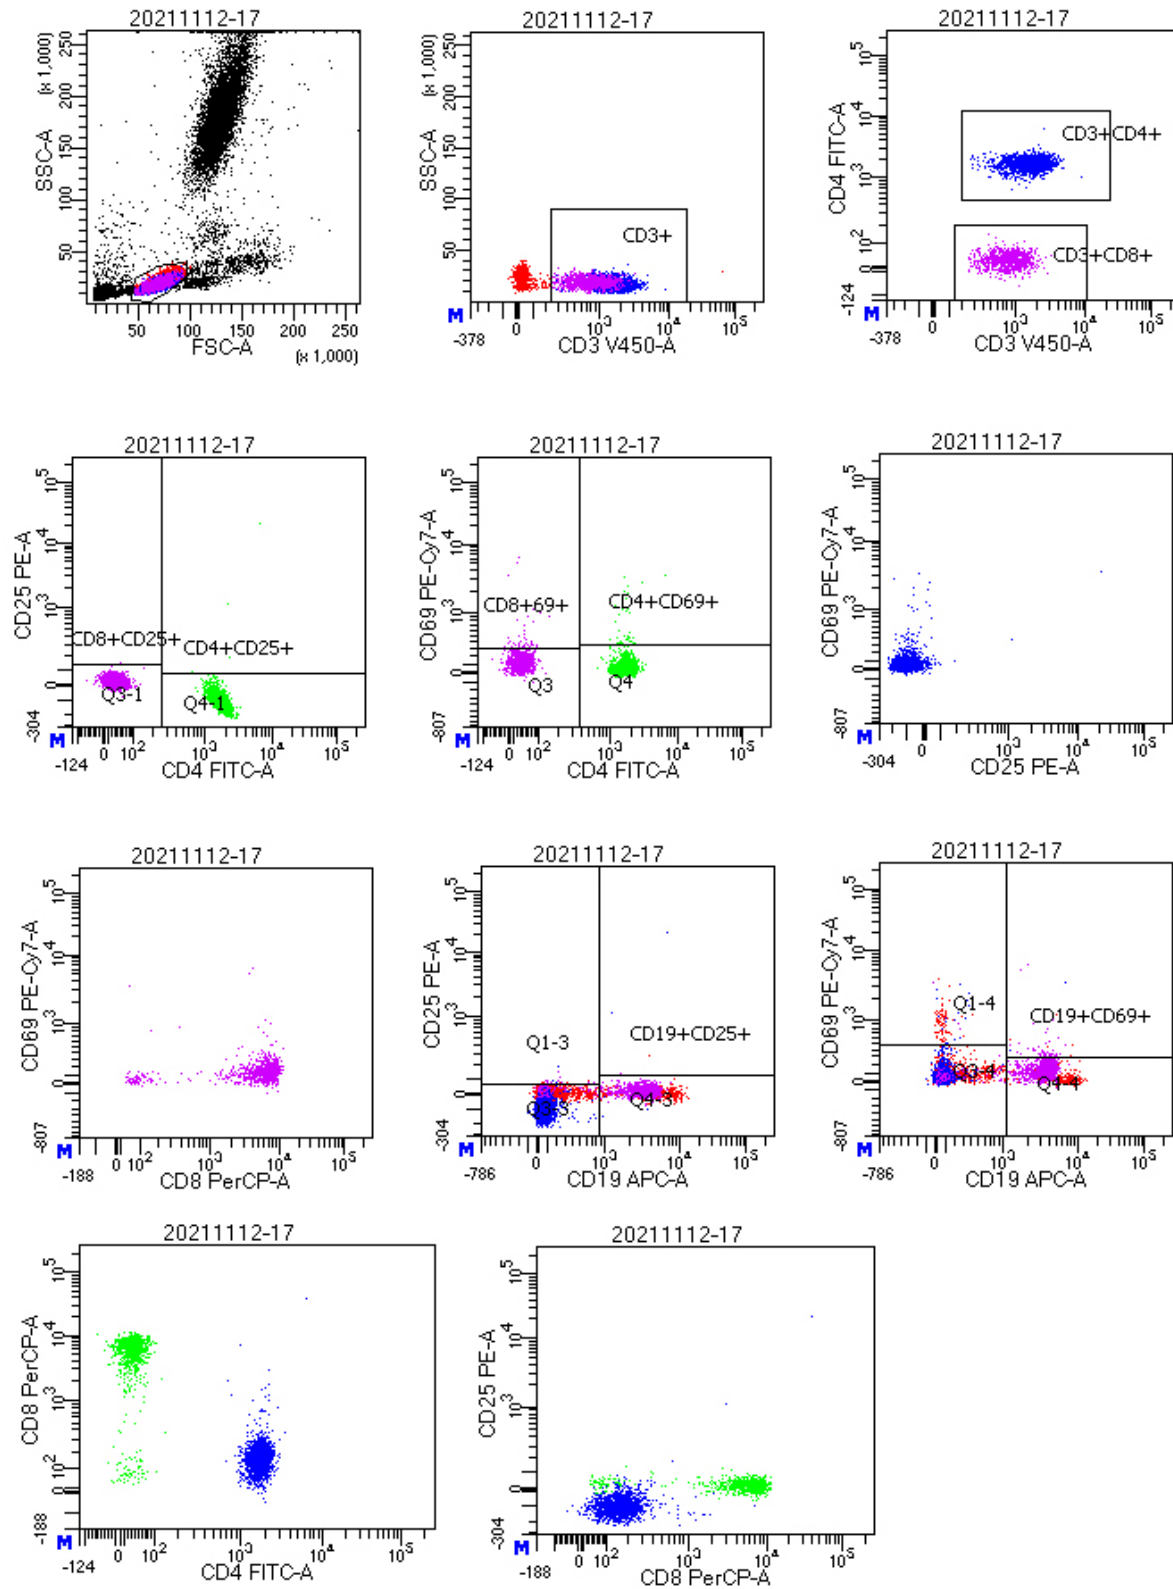

**Figure. S2.** CD4+, CD8+, CD25+, CD69+ cells responses to COVID-19 vaccination. Intracellular cytokine staining T-cell responses including CD4, CD8, CD69 and CD25.

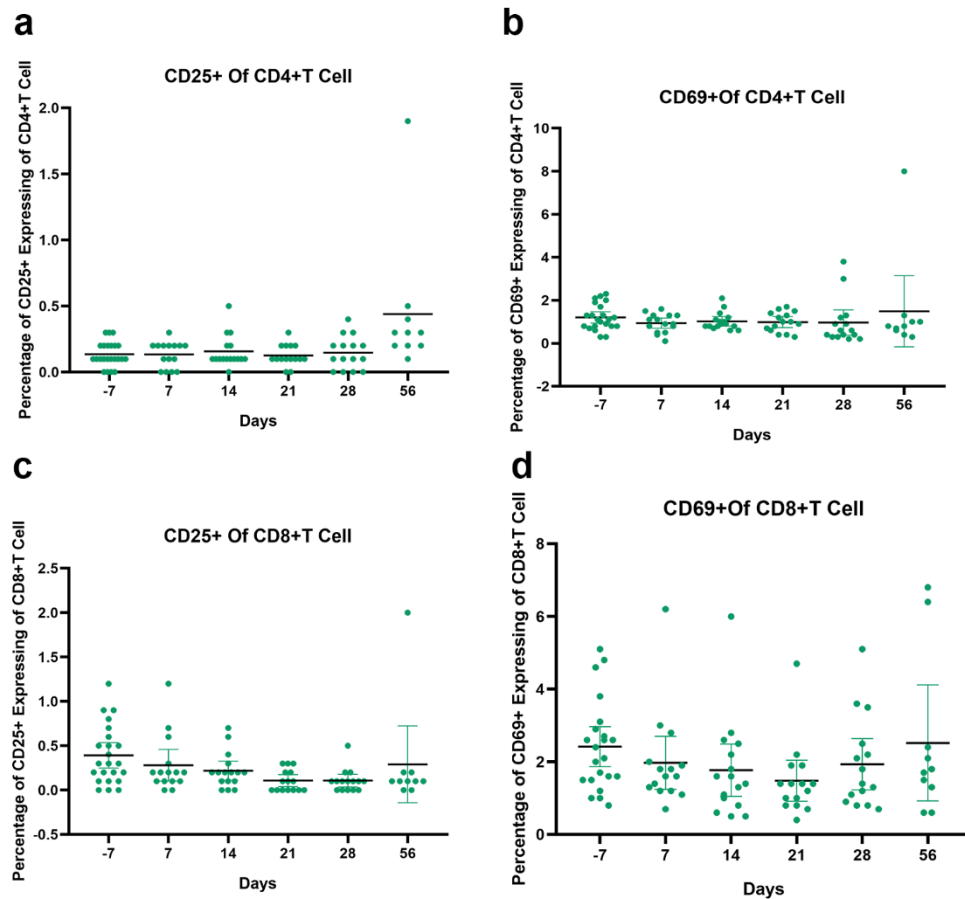

**Figure. S3.** CD25+, CD69+ of T cell responses to COVID-19 vaccination of 16 volunteers.  
a. CD25+CD4+ T cell trend chart of the time points before and after COVID-19 vaccination;  
b. CD69+CD4+ T cell trend chart of the time points before and after COVID-19 vaccination;  
c. CD25+CD8+ T cell trend chart of the time points before and after COVID-19 vaccination;  
d. CD69+CD8+ T cell trend chart of the time points before and after COVID-19 vaccination;
